# Supplementary material for: Breastfeeding and Later‐Life Cardiometabolic Health in Women With and Without Hypertensive Disorders of Pregnancy
Source: PubMed Central journal article supplement (PMC10111449; doi:10.1161/jaha.122.026696), 2023-02-27
Supplement: JAH3-12-e026696-s001.pdf [file JAH3-12-e026696-s001.pdf]

## **SUPPLEMENTAL MATERIAL**

Table S1. Pairwise correlations for cardiometabolic outcomes

|                                    | 1     | 2     | 3     | 4     | 5    | 6     | 7    | 8    | 9    | 10   | 11   | 12   | 13   | 14   |
|------------------------------------|-------|-------|-------|-------|------|-------|------|------|------|------|------|------|------|------|
| Triglycerides (1)                  | 1.00  |       |       |       |      |       |      |      |      |      |      |      |      |      |
| HDL cholesterol (2)*               | -0.44 | 1.00  |       |       |      |       |      |      |      |      |      |      |      |      |
| Body Mass Index (3)                | 0.33  | -0.38 | 1.00  |       |      |       |      |      |      |      |      |      |      |      |
| Waist circumference (4)            | 0.40  | -0.41 | 0.90  | 1.00  |      |       |      |      |      |      |      |      |      |      |
| Carotid intima-media thickness (5) | 0.06  | 0.01  | 0.06  | 0.07  | 1.00 |       |      |      |      |      |      |      |      |      |
| Arterial distensibility (6)        | -0.13 | 0.06  | -0.05 | -0.07 | 0.16 | 1.00  |      |      |      |      |      |      |      |      |
| Insulin (7)                        | 0.38  | -0.37 | 0.50  | 0.52  | 0.02 | -0.11 | 1.00 |      |      |      |      |      |      |      |
| Proinsulin (8)                     | 0.37  | -0.28 | 0.47  | 0.49  | 0.03 | -0.07 | 0.71 | 1.00 |      |      |      |      |      |      |
| Glucose (9)                        | 0.25  | -0.15 | 0.21  | 0.24  | 0.08 | -0.06 | 0.40 | 0.42 | 1.00 |      |      |      |      |      |
| C-reactive protein (10)            | 0.28  | -0.30 | 0.55  | 0.54  | 0.01 | -0.05 | 0.33 | 0.29 | 0.13 | 1.00 |      |      |      |      |
| Systolic blood pressure (11)       | 0.20  | -0.10 | 0.31  | 0.34  | 0.20 | 0.03  | 0.25 | 0.24 | 0.16 | 0.21 | 1.00 |      |      |      |
| LDL cholesterol (12) †             | 0.29  | -0.22 | 0.17  | 0.20  | 0.08 | -0.11 | 0.11 | 0.09 | 0.04 | 0.12 | 0.13 | 1.00 |      |      |
| Diastolic blood pressure (13)      | 0.17  | -0.09 | 0.25  | 0.27  | 0.09 | -0.14 | 0.23 | 0.21 | 0.09 | 0.19 | 0.66 | 0.11 | 1.00 |      |
| Mean arterial pressure (14)        | 0.20  | -0.10 | 0.30  | 0.32  | 0.14 | -0.08 | 0.26 | 0.25 | 0.13 | 0.22 | 0.86 | 0.13 | 0.95 | 1.00 |

\* HDL- high density lipoprotein

† LDL- low density lipoprotein

Table S2. Distribution of background characteristics among eligible women who did and did not attend the clinical follow-up evaluation 18 years after recruitment

| Characteristics                                    | Did not attend clinical follow-up (n=9,947) | Attended clinical follow-up (n=3,659) | p-value |
|----------------------------------------------------|---------------------------------------------|---------------------------------------|---------|
| Maternal age at birth of index child, y, mean (SD) | 27.3 (5.0)                                  | 29.8 (4.4)                            | <0.001  |
| Race, n (%)                                        |                                             |                                       | 0.001   |
| White                                              | 7,785 (97.0)                                | 3,546 (98.0)                          |         |
| Black                                              | 101 (1.3)                                   | 26 (0.7)                              |         |
| Other                                              | 140 (1.7)                                   | 46 (1.3)                              |         |
| Missing                                            | 1,921                                       | 41                                    |         |
| Married, n (%)                                     |                                             |                                       | <0.001  |
| No                                                 | 2,436 (27.1)                                | 540 (14.9)                            |         |
| Yes                                                | 6,541 (72.9)                                | 3,091 (85.1)                          |         |
| Missing                                            | 970                                         | 28                                    |         |
| Manual social class, n (%)                         |                                             |                                       | <0.001  |
| No                                                 | 5,054 (70.2)                                | 2,713 (82.6)                          |         |
| Yes                                                | 2,146 (29.8)                                | 572 (17.4)                            |         |
| Missing                                            | 2,747                                       | 374                                   |         |
| University level education, n (%)                  |                                             |                                       | <0.001  |
| No                                                 | 7,315 (90.2)                                | 2,911 (80.3)                          |         |
| Yes                                                | 799 (9.9)                                   | 714 (19.7)                            |         |
| Missing                                            | 1,833                                       | 34                                    |         |
| Pre-pregnancy BMI, kg/m <sup>2</sup> , mean (SD)   | 23.1 (23.1)                                 | 22.5 (3.3)                            | <0.001  |
| Nulliparous, n (%)                                 |                                             |                                       | 0.002   |
| No                                                 | 5,876 (66.9)                                | 2,323 (63.9)                          |         |
| Yes                                                | 2,913 (33.1)                                | 1,310 (36.1)                          |         |
| Missing                                            | 1,158                                       | 26                                    |         |
| Smoking during pregnancy, n (%)                    |                                             |                                       | <0.001  |
| No                                                 | 6,045 (69.0)                                | 3,105 (85.7)                          |         |
| Yes                                                | 2,721 (31.04)                               | 520 (14.3)                            |         |
| Missing                                            | 1,181                                       | 34                                    |         |
| Pregnancy diabetes mellitus, n (%)                 |                                             |                                       | 0.624   |
| None                                               | 7,697 (95.8)                                | 3,519 (96.2)                          |         |
| GDM                                                | 36 (0.5)                                    | 18 (0.5)                              |         |
| Pregestational diabetes mellitus                   | 28 (0.4)                                    | 14 (0.4)                              |         |
| Glycosuria                                         | 273 (3.4)                                   | 108 (3.0)                             |         |
| Missing                                            | 1,913                                       | 0                                     |         |
| Hypertensive disorders of pregnancy, n (%)         |                                             |                                       | <0.001  |
| None                                               | 6,067 (82.3)                                | 3,115 (85.1)                          |         |
| Gestational hypertension                           | 1,142 (15.5)                                | 470 (12.9)                            |         |
| Preeclampsia                                       | 165 (2.2)                                   | 74 (2.0)                              |         |
| Missing                                            | 2,141                                       | 0                                     |         |
| Preterm birth, n (%)                               |                                             |                                       | <0.001  |
| No                                                 | 9,058 (91.4)                                | 3,514 (96.0)                          |         |
| Yes                                                | 858 (8.7)                                   | 145 (4.0)                             |         |
| Missing                                            | 31                                          | 0                                     |         |

Table S3. P values for adjusted associations of duration of any breastfeeding with measures of cardiometabolic health

|                                      | < 1 month | 1-<3 months | 3-<6 months | 6-<9 months | 9+ months |
|--------------------------------------|-----------|-------------|-------------|-------------|-----------|
| Body Mass Index (kg/m <sup>2</sup> ) | .23       | .08         | .48         | .007        | .01       |
| Waist Circumference (cm)             | .63       | .04         | .31         | .02         | .02       |
| Systolic BP (mmHg)                   | .56       | .09         | .98         | .63         | .13       |
| Arterial distensibility (mm)         | .82       | .48         | .95         | .53         | .68       |
| cIMT(mm) *                           | .05       | .46         | .61         | .36         | .80       |
| CRP (% change) †                     | .03       | .01         | .003        | .000        | .001      |
| HDL (mmol/L) ‡                       | .61       | .007        | .34         | .002        | .05       |
| Triglycerides (mmol/L)               | .40       | .006        | .48         | .03         | .006      |
| Insulin (% change)                   | .74       | .02         | .70         | .004        | .04       |
| Proinsulin (% change)                | .77       | .11         | .83         | .01         | .02       |

\* cMIT - carotid intima-media thickness

† CRP- C- reactive protein

‡ HDL- high density lipoprotein cholesterol

Table S4. P values for adjusted associations of duration of any breastfeeding with diastolic blood pressure, mean arterial pressure, LDL-cholesterol, and glucose stratified by presence of hypertensive disorders of pregnancy (HDP)

|                                               | < 1 month | 1-<3 months | 3-<6 months | 6-<9 months | 9+ months |
|-----------------------------------------------|-----------|-------------|-------------|-------------|-----------|
| <i>No Hypertensive disorders of pregnancy</i> |           |             |             |             |           |
| Diastolic BP (mmHg)                           | .78       | .07         | .97         | .67         | .06       |
| Mean arterial pressure                        | .86       | .09         | .69         | .92         | .11       |
| LDL cholesterol (mmol/L)*                     | .68       | .86         | .82         | .38         | .32       |
| Glucose (% change)                            | .75       | .34         | .23         | .35         | .81       |
| <i>Hypertensive disorder of pregnancy</i>     |           |             |             |             |           |
| Diastolic BP (mmHg)                           | .08       | .05         | .09         | .002        | .26       |
| Mean arterial pressure                        | .09       | .04         | .05         | .002        | .17       |
| LDL cholesterol (mmol/L)*                     | .07       | .001        | .07         | .001        | .02       |
| Glucose (% change)                            | .63       | .03         | .38         | .06         | .14       |

\*LDL- low density lipoprotein

Table S5. P-values from the Interaction Test of Any Breastfeeding and Hypertensive Disorders of Pregnancy on Cardiometabolic Health Measurements

| Outcome                  | < 1 month | 1-<3 months | 3- <6 months | 6- <9 months | 9 months |
|--------------------------|-----------|-------------|--------------|--------------|----------|
| Body-mass index          | 0.103     | 0.563       | 0.117        | 0.585        | 0.750    |
| Waist circumference      | 0.195     | 0.867       | 0.278        | 0.398        | 0.573    |
| Systolic blood pressure  | 0.460     | 0.376       | 0.093        | 0.125        | 0.946    |
| Diastolic blood pressure | 0.125     | 0.421       | 0.178        | 0.023        | 0.642    |
| Mean arterial pressure   | 0.173     | 0.360       | 0.107        | 0.028        | 0.768    |
| cIMT*                    | 0.912     | 0.050       | 0.306        | 0.898        | 0.485    |
| Arterial distensibility  | 0.371     | 0.961       | 0.322        | 0.787        | 0.897    |
| Glucose                  | 0.782     | 0.053       | 0.158        | 0.047        | 0.078    |
| Insulin                  | 0.992     | 0.678       | 0.398        | 0.804        | 0.782    |
| Proinsulin               | 0.446     | 0.823       | 0.849        | 0.742        | 0.386    |
| Triglycerides            | 0.358     | 0.245       | 0.803        | 0.376        | 0.850    |
| HDL-cholesterol †        | 0.605     | 0.295       | 0.987        | 0.326        | 0.923    |
| LDL-cholesterol ‡        | 0.139     | 0.004       | 0.201        | 0.020        | 0.202    |
| C-reactive protein       | 0.662     | 0.656       | 0.851        | 0.951        | 0.995    |

\*cMIT - carotid intima-media thickness

† HDL- high density lipoprotein

‡ LDL- low density lipoprotein

p < .05 indicates a significant interaction test between any breastfeeding by duration category and hypertensive disorder of pregnancy

Table S6. Distribution of cardiometabolic health measurements at 18 year follow-up according to duration of any breastfeeding for index pregnancy

| Characteristics                        | Duration of Any Breastfeeding (months) |               |               |               |               |               | p-value* |
|----------------------------------------|----------------------------------------|---------------|---------------|---------------|---------------|---------------|----------|
|                                        | Never (n=509)                          | <1 (n=317)    | 1-<3 (n=428)  | 3-<6 (n=653)  | 6-<9 (n=651)  | 9+ (n=1,040)  |          |
| BMI, kg/m <sup>2</sup> , mean (SD)     | 27.95 (6.08)                           | 26.96 (5.36)  | 26.85 (5.46)  | 26.53 (5.20)  | 25.72 (4.68)  | 25.65 (4.60)  | <0.001   |
| Waist circumference, cm, mean (SD)     | 87.39 (13.87)                          | 85.53 (12.63) | 84.62 (12.82) | 84.25 (11.97) | 82.60 (11.31) | 82.57 (10.79) | <0.001   |
| SBP, mmHg, mean (SD)†                  | 118.99 (12.34)                         | 117.8 (11.62) | 116.9 (12.40) | 118.2 (12.29) | 117.7 (11.82) | 117.3 (12.52) | 0.066    |
| DBP, mmHg, mean (SD)‡                  | 73.82 (10.64)                          | 72.52 (10.57) | 71.74 (9.56)  | 72.56 (9.23)  | 72.03 (10.70) | 71.69 (10.49) | 0.004    |
| cIMT, mm, mean (SD) §                  | 0.554 (0.061)                          | .546 (.056)   | 0.552 (0.065) | 0.560 (0.063) | 0.562 (0.060) | 0.562 (0.064) | <0.001   |
| Arterial distensibility, mm, mean (SD) | 0.505 (.119)                           | 0.501 (.108)  | 0.509 (0.120) | 0.497 (0.122) | 0.499 (0.115) | 0.491 (0.115) | 0.044    |
| Glucose, mmol/L, mean (SD)             | 5.39 (1.27)                            | 5.29 (1.01)   | 5.24 (1.03)   | 5.29 (0.78)   | 5.19 (0.54)   | 5.27 (1.02)   | 0.014    |
| Insulin, pmol/L, mean (SD)             | 40.86 (42.56)                          | 40.04 (48.68) | 34.88 (38.23) | 38.58 (43.82) | 31.65 (30.16) | 32.44 (25.80) | <0.001   |
| Proinsulin, pmol/L, mean (SD)          | 9.47 (12.54)                           | 8.88 (9.38)   | 8.64 (8.87)   | 9.20 (12.38)  | 7.70 (8.61)   | 7.30 (5.26)   | <0.001   |
| Triglycerides, mmol/L, mean (SD)       | 1.09 (.57)                             | 1.04 (.49)    | 0.97 (0.46)   | 1.04 (0.59)   | 0.97 (0.49)   | 0.98 (0.49)   | <0.001   |
| HDL, mmol/L, mean (SD)                 | 1.40 (.37)                             | 1.41 (.36)    | 1.50 (0.38)   | 1.47 (0.37)   | 1.54 (0.39)   | 1.52 (0.38)   | <0.001   |
| LDL, mmol/L, mean (SD) #               | 3.02 (.84)                             | 3.00 (.86)    | 2.93 (0.78)   | 3.01 (0.76)   | 2.92 (0.78)   | 2.99 (0.81)   | 0.250    |
| C-reactive protein, mg/L, mean (SD)    | 3.00 (4.65)                            | 2.49 (3.73)   | 2.28 (3.53)   | 2.02 (3.59)   | 1.81 (3.00)   | 1.89 (4.03)   | <0.001   |

\*p-value corresponding to an unadjusted F test for any difference between breastfeeding categories compared to never breastfeeding

† SBP- systolic blood pressure

‡ DBP- diastolic blood pressure

§ cMIT - carotid intima-media thickness

|| HDL- high density lipoprotein

# LDL- low density lipoprotein

Table S7. Test for linear trend for all participants for cardiometabolic outcomes with no evidence of a difference in the association with breastfeeding according to hypertensive disorders during pregnancy status

| Outcome                 | Test for linear trend p-value |
|-------------------------|-------------------------------|
| Triglycerides           | 0.013                         |
| HDL-cholesterol*        | 0.010                         |
| Body-mass index         | 0.011                         |
| Waist circumference     | 0.009                         |
| cIMT†                   | 0.294                         |
| Arterial distensability | 0.756                         |
| Insulin                 | 0.022                         |
| Proinsulin              | 0.009                         |
| C-reactive protein      | 0.002                         |
| Systolic blood pressure | 0.290                         |

\*HDL- high density lipoprotein

†cMIT - carotid intima-media thickness

The p-values were estimated by entering breastfeeding duration categories as a single continuous variable



Table S8. Test for linear trend for outcomes with evidence of a difference in the association with breastfeeding according to hypertensive disorders during pregnancy status

| Outcome                  | Test for linear trend p-value among women without hypertensive disorders during pregnancy | Test for linear trend p-value among women with hypertensive disorders during pregnancy |
|--------------------------|-------------------------------------------------------------------------------------------|----------------------------------------------------------------------------------------|
| LDL-cholesterol*         | 0.118                                                                                     | 0.027                                                                                  |
| Diastolic blood pressure | 0.122                                                                                     | 0.174                                                                                  |
| Mean arterial pressure   | 0.234                                                                                     | 0.108                                                                                  |
| Glucose                  | 0.871                                                                                     | 0.123                                                                                  |

\*LDL- low density lipoprotein

The p-values were estimated by entering breastfeeding duration categories as a single continuous variable

Table S9. Unadjusted associations of duration of any breastfeeding with measures of cardiometabolic health

|                                      | < 1 month               | 1-<3 months              | 3-<6 months              | 6- <9 months             | 9+ months                |
|--------------------------------------|-------------------------|--------------------------|--------------------------|--------------------------|--------------------------|
|                                      | Mean difference(95% CI) | Mean difference(95% CI)  | Mean difference(95% CI)  | Mean difference(95% CI)  | Mean difference(95% CI)  |
| Body Mass Index (kg/m <sup>2</sup> ) | -0.98 (-1.70, -0.26)*   | -1.09 (-1.75, -0.43)†    | -1.42 (-2.01, -0.82)†    | -2.22 (-2.82, -1.63)†    | -2.28 (-2.82, -1.74)†    |
| Waist Circumference (cm)             | -1.79 (-3.47, -0.11)*   | -2.69 (-4.23, -1.14)†    | -3.09 (-4.48, -1.70)†    | -4.72 (-6.12, -3.33)†    | -4.73 (-6.00, -3.46)†    |
| Systolic BP (mmHg)                   | -1.08 (-2.81, 0.65)     | -1.88 (-3.47, -0.29)*    | -0.68 (-2.11, 0.75)      | -1.26 (-2.70, 0.17)      | -1.59 (-2.90, -0.28)*    |
| Arterial distensibility (mm)         | -0.00 (-0.02, 0.01)     | 0.00 (-0.01, 0.02)       | -0.01 (-0.02, 0.01)      | -0.01 (-0.02, 0.01)      | -0.01 (-0.03, -0.00)*    |
| cIMT(mm) ‡                           | -0.01 (-0.02, 0.00)     | -0.00 (-0.01, 0.01)      | 0.01 (-0.00, 0.01)       | 0.01 (0.00, 0.02)*       | 0.01 (0.00, 0.01)*       |
| CRP (% change) §                     | -23.90 (-40.52, -7.27)* | -26.31 (-41.64, -10.99)† | -33.95 (-47.60, -20.29)† | -45.76 (-59.75, -31.76)† | -42.80 (-55.27, -30.34)† |
| HDL (mmol/L)                         | 0.01 (-0.04, 0.07)      | 0.09 (0.04, 0.15)†       | 0.08 (0.03, 0.12)*       | 0.14 (0.10, 0.19)†       | 0.13 (0.09, 0.17)†       |
| Triglycerides (mmol/L)               | -0.07 (-0.14, 0.01)     | -0.13 (-0.20, -0.06)†    | -0.06 (-0.12, 0.00)      | -0.12 (-0.18, -0.06)†    | -0.12 (-0.17, -0.06)†    |
| Insulin (% change)                   | -5.44 (-14.29, 3.40)    | -14.42 (-22.81, -6.04)†  | -9.54 (-17.02, -2.06)*   | -21.28 (-28.69, -13.86)† | -18.98 (-25.67, -12.30)† |
| Proinsulin (% change)                | -5.63 (-14.11, 2.85)    | -10.44 (-18.33, -2.56)*  | -6.55 (-13.38, 0.29)     | -17.50 (-24.35, -10.64)† | -16.04 (-22.39, -9.70)†  |

\*p<.05

†p<.001 (Bonferroni correction)

‡ cMIT - carotid intima-media thickness

§ CRP- C- reactive protein

|| HDL- high density lipoprotein

Reference group=participants who never breastfed

Table S10. Unadjusted associations of duration of any breastfeeding with diastolic blood pressure, mean arterial pressure, and LDL-cholesterol stratified by hypertension during pregnancy

|                                               | < 1 month                | 1-<3 months              | 3-<6 months              | 6- <9 months             | 9+ months                |
|-----------------------------------------------|--------------------------|--------------------------|--------------------------|--------------------------|--------------------------|
|                                               | Mean difference (95% CI) | Mean difference (95% CI) | Mean difference (95% CI) | Mean difference (95% CI) | Mean difference (95% CI) |
| <i>No Hypertensive disorders of pregnancy</i> |                          |                          |                          |                          |                          |
| Diastolic BP (mmHg)                           | -0.42 (-1.97, 1.13)      | -1.63 (-3.07, -0.19)*    | -0.38 (-1.66, 0.90)      | -0.90 (-2.18, 0.39)      | -1.63 (-2.81, -0.45)*    |
| Mean arterial pressure                        | -0.39 (-1.88, 1.11)      | -1.55 (-2.95, -0.15)*    | -0.12 (-1.36, 1.12)      | -0.72 (-1.97, 0.53)      | -1.34 (-2.49, -0.20)*    |
| LDL cholesterol (mmol/L) ‡                    | 0.02 (-0.12, 0.15)       | -0.01 (-0.13, 0.12)      | 0.02 (-0.09, 0.13)       | -0.05 (-0.16, 0.06)      | -0.00 (-0.10, 0.10)      |
| Glucose (% change)                            | -0.89 (-2.77, 0.98)      | -1.31 (-3.05, 0.43)      | -0.01 (-1.54, 1.53)      | -1.65 (-3.18, -0.12)*    | -0.51 (-1.90, 0.88)      |
| <i>Hypertensive disorders of pregnancy</i>    |                          |                          |                          |                          |                          |
| Diastolic BP (mmHg)                           | -4.26 (-7.91, -0.60)*    | -3.53 (-6.68, -0.38)*    | -3.18 (-6.30, -0.07)*    | -5.04(-7.99,-2.10)†      | -1.77 (-4.56, 1.02)      |
| Mean arterial pressure                        | -3.81 (-7.33, -0.30)*    | -3.69 (-6.72, -0.66)*    | -3.28 (-6.28, -0.29)*    | -4.73(-7.57,-1.89)†      | -1.85 (-4.54, 0.83)      |
| LDL cholesterol (mmol/L) ‡                    | -0.23 (-0.52, 0.05)      | -0.39 (-0.65, -0.14)*    | -0.12 (-0.36, 0.12)      | -0.32 (-0.55, -0.09)*    | -0.13 (-0.35, 0.09)      |
| Glucose (% change)                            | -2.07 (-8.39, 4.25)      | -6.11(-11.61,-0.60)*     | -4.50 (-10.02, 1.03)     | -6.50(-11.69,-1.31)*     | -5.76(-10.71,-0.82)*     |

\*p<.05

†p<.001 (Bonferroni correction)

‡LDL- low density lipoprotein

Reference group=participants who never breastfed

Table S11. Adjusted associations of duration of exclusive breastfeeding with measures of cardiometabolic health

|                                      | < 1 month                | 1-<3 months              | 3-<6 months              |
|--------------------------------------|--------------------------|--------------------------|--------------------------|
|                                      | Mean difference (95% CI) | Mean difference (95% CI) | Mean difference (95% CI) |
| Body Mass Index (kg/m <sup>2</sup> ) | -0.28 (-0.65, 0.09)      | -0.37 (-0.75, 0.01)      | -0.46 (-0.82, -0.10)*    |
| Waist Circumference (cm)             | -0.80 (-1.79, 0.19)      | -0.79 (-1.80, 0.22)      | -1.27 (-2.23, -0.31)*    |
| Systolic BP (mmHg)                   | -0.60 (-1.91, .71)       | -.31 (-1.64, 1.02)       | -0.94 (-2.20, 0.32)      |
| Arterial distensibility (mm)         | 0.00 (-0.01, 0.02)       | -0.00 (-0.01, 0.01)      | 0.00 (-0.01, 0.02)       |
| cIMT(mm) ‡                           | -0.00 (-0.01, 0.00)      | -0.00 (-0.01, 0.01)      | 0.00 (-0.01, 0.01)       |
| CRP (% change) §                     | -16.01 (-28.23, -3.79)*  | -26.59(-39.35, -13.82)†  | -20.03(-31.86, -8.20)†   |
| HDL (mmol/L)                         | 0.03 (-0.01, 0.07)       | 0.05 (0.00, 0.08)*       | 0.04 (0.00, 0.08)*       |
| Triglycerides (mmol/L)               | -0.05 (-0.11, 0.01)      | -0.07 (-0.13, -0.02)*    | -0.06 (-0.12, -0.01)*    |
| Insulin (% change)                   | -2.80 (-9.47, 3.86)      | -8.49 (-15.17, -1.82)*   | -7.04 (-13.41, -.67)*    |
| Proinsulin (% change)                | -3.77 (-9.98, 2.44)      | -5.90 (-12.06, .25)      | -4.27 (-10.16, 1.61)     |

\*p<.05

†p<.001 (Bonferroni correction)

‡ cMIT - carotid intima-media thickness

§ CRP- C- reactive protein

|| HDL- high density lipoprotein

The reference group includes those who never breastfed. All outcomes were adjusted for age at delivery, race, pre-pregnancy BMI, parity, smoking, marital status, and gestational diabetes. Blood pressure outcomes were further adjusted for use of antihypertensive medications. Glucose, insulin, and proinsulin outcomes were further adjusted for diabetes medications. LDL-cholesterol and HDL-cholesterol outcomes were further adjusted for cholesterol lowering medications.

Table S12. P-values for adjusted associations of duration of exclusive breastfeeding with measures of cardiometabolic health

|                                      | < 1 month | 1-<3 months | 3-<6 months |
|--------------------------------------|-----------|-------------|-------------|
| Body Mass Index (kg/m <sup>2</sup> ) | .14       | .06         | .01         |
| Waist Circumference (cm)             | .12       | .12         | .009        |
| Systolic BP (mmHg)                   | .37       | .65         | .14         |
| Arterial distensibility (mm)         | .54       | .83         | .58         |
| cIMT(mm) *                           | .51       | .60         | .72         |
| CRP (% change) †                     | .01       | .000        | .001        |
| HDL (mmol/L) ‡                       | .14       | .04         | .04         |
| Triglycerides (mmol/L)               | .10       | .01         | .03         |
| Insulin (% change)                   | .41       | .01         | .03         |
| Proinsulin (% change)                | .23       | .06         | .16         |

\*cMIT - carotid intima-media thickness

†CRP- C-reactive protein

‡HDL- high density lipoprotein

Table 13. P-values from the Interaction Test of Exclusive Breastfeeding and Hypertensive Disorders of Pregnancy on Cardiometabolic Health Measurements

| Outcome                  | < 1 month | 1-<3 months | 3- <6 months |
|--------------------------|-----------|-------------|--------------|
| Body-mass index          | 0.629     | 0.261       | 0.917        |
| Waist circumference      | 0.712     | 0.789       | 0.830        |
| Systolic blood pressure  | 0.539     | 0.059       | 0.380        |
| Diastolic blood pressure | 0.301     | 0.050       | 0.587        |
| Mean arterial pressure   | 0.335     | 0.034       | 0.465        |
| cIMT*                    | 0.417     | 0.727       | 0.191        |
| Arterial distensibility  | 0.531     | 0.741       | 0.472        |
| Glucose                  | 0.539     | 0.005       | 0.043        |
| Insulin                  | 0.519     | 0.665       | 0.653        |
| Proinsulin               | 0.970     | 0.262       | 0.763        |
| Triglycerides            | 0.274     | 0.742       | 0.675        |
| HDL-cholesterol†         | 0.217     | 0.588       | 0.998        |
| LDL-cholesterol‡         | 0.048     | 0.028       | 0.042        |
| C-reactive protein       | 0.712     | 0.788       | 0.924        |

\*cMIT - carotid intima-media thickness

†HDL- high density lipoprotein

‡LDL- low density lipoprotein

p < .05 indicates a significant interaction test between exclusive breastfeeding by duration category and hypertensive disorder of pregnancy

Table S14. Adjusted associations of duration of exclusive breastfeeding with diastolic blood pressure, mean arterial pressure, LDL-cholesterol, and glucose stratified by the presence of hypertension during pregnancy

|                                               | < 1 month                | 1-<3 months              | 3-<6 months              |
|-----------------------------------------------|--------------------------|--------------------------|--------------------------|
|                                               | Mean difference (95% CI) | Mean difference (95% CI) | Mean difference (95% CI) |
| <i>No Hypertensive disorders of pregnancy</i> |                          |                          |                          |
| Diastolic BP (mmHg)                           | -0.56 (-1.77, 0.66)      | -0.71 (-1.94, 0.52)      | -0.65 (-1.82, 0.52)      |
| Mean arterial pressure                        | -0.43 (-1.60, 0.73)      | -0.32 (-1.50, 0.86)      | -0.53 (-1.65, 0.59)      |
| LDL cholesterol (mmol/L) ‡                    | -0.01 (-0.11, 0.10)      | 0.02 (-0.08, 0.12)       | -0.05 (-0.15, 0.05)      |
| Glucose (% change)                            | -0.46 (-1.79, 0.88)      | 0.36 (-0.93, 1.65)       | -0.24 (-1.48, 1.00)      |
| <i>Hypertensive disorders of pregnancy</i>    |                          |                          |                          |
| Diastolic BP (mmHg)                           | -2.58 (-5.30, 0.14)      | -4.22 (-7.04, -1.40)*    | -2.63 (-5.34, 0.09)      |
| Mean arterial pressure                        | -2.44 (-5.01, 0.14)      | -4.07 (-6.74, -1.40)*    | -2.94 (-5.51, -0.37)*    |
| LDL cholesterol (mmol/L) ‡                    | -0.29 (-0.50, -0.08)*    | -0.32 (-0.54, -0.10)*    | -0.35 (-0.55, -0.14)†    |
| Glucose (% change)                            | -1.78 (-5.49, 1.93)      | -4.48 (-8.35, -0.61)*    | -3.44 (-7.17, 0.29)      |

\*p<.05

†p<.001 (Bonferroni correction)

‡ LDL- low density lipoprotein

The reference group includes those who never breastfed. All outcomes were adjusted for a ge at delivery, race, pre-pregnancy BMI, parity, smoking, marital status, and gestational diabetes. Blood pressure outcomes were further adjusted for use of antihypertensive medications. Glucose, insulin, and proinsulin outcomes were further adjusted for diabetes medications. LDL-cholesterol and HDL-cholesterol outcomes were further adjusted for cholesterol lowering medications.

Table S15. p values for adjusted associations of duration of exclusive breastfeeding with diastolic blood pressure, mean arterial pressure, LDL-cholesterol, and glucose stratified by the presence of hypertension during pregnancy

|                                               | < 1 month | 1-<3 months | 3-<6 months |
|-----------------------------------------------|-----------|-------------|-------------|
| <i>No Hypertensive disorders of pregnancy</i> |           |             |             |
| Diastolic BP (mmHg)                           | .37       | .26         | .27         |
| Mean arterial pressure                        | .47       | .60         | .35         |
| LDL cholesterol (mmol/L)*                     | .88       | .70         | .35         |
| Glucose (% change)                            | .50       | .58         | .71         |
| <i>Hypertensive disorders of pregnancy</i>    |           |             |             |
| Diastolic BP (mmHg)                           | .06       | .004        | .06         |
| Mean arterial pressure                        | .06       | .003        | .03         |
| LDL cholesterol (mmol/L)*                     | .008      | .005        | .001        |
| Glucose (% change)                            | .35       | .02         | .07         |

\*LDL- low density lipoprotein



Table S16. Unadjusted associations of duration of exclusive breastfeeding with measures of cardiometabolic health

|                                      | < 1 month                | 1-<3 months              | 3-<6 months              |
|--------------------------------------|--------------------------|--------------------------|--------------------------|
|                                      | Mean difference (95% CI) | Mean difference (95% CI) | Mean difference (95% CI) |
| Body Mass Index (kg/m <sup>2</sup> ) | -1.05 (-1.61, -0.49)†    | -1.61 (-2.18, -1.05)†    | -2.35 (-2.87, -1.83)†    |
| Waist Circumference (cm)             | -2.36 (-3.67, -1.05)†    | -3.29 (-4.61, -1.96)†    | -5.01 (-6.22, -3.79)†    |
| Systolic BP (mmHg)                   | -0.94 (-2.29, 0.42)      | -1.02 (-2.38, 0.35)      | -1.73 (-2.98, -0.48)*    |
| Arterial distensibility (mm)         | -0.00 (-0.02, 0.01)      | -0.01 (-0.02, 0.01)      | -0.01 (-0.02, 0.00)      |
| cIMT (mm) ‡                          | 0.00 (-0.01, 0.01)       | 0.00 (-0.01, 0.01)       | 0.01 (0.00, 0.01)*       |
| CRP (% change) §                     | -24.80 (-37.66, -11.92)† | -41.01 (-54.32, -27.67)† | -42.99 (-55.04, -30.95)† |
| HDL (mmol/L)                         | 0.07 (0.03, 0.12)†       | 0.10 (0.05, 0.14)†       | 0.13 (0.09, 0.17)†       |
| Triglycerides (mmol/L)               | -0.07 (-0.13, -0.02)*    | -0.11 (-0.17, -0.05)†    | -0.11 (-0.17, -0.06)†    |
| Insulin (% change)                   | -8.01 (-15.01, -1.02)*   | -16.47 (-23.47, -9.47)†  | -19.51 (-25.98, -13.03)† |
| Proinsulin (% change)                | -8.40 (-14.92, -1.87)    | -13.17 (-19.78, -6.56)   | -14.67 (-20.72, -8.62)   |

\*p<.05

†p<.001 (Bonferroni correction)

‡ cMIT - carotid intima-media thickness

§ CRP- C- reactive protein

|| HDL- high density lipoprotein

The reference group includes those who never breastfed.

Table S17. Unadjusted associations of duration of exclusive breastfeeding with diastolic blood pressure, mean arterial pressure, LDL-cholesterol, and glucose stratified by hypertension during pregnancy

|                                               | < 1 month                   | 1-<3 months                 | 3-<6 months                 |
|-----------------------------------------------|-----------------------------|-----------------------------|-----------------------------|
|                                               | Mean difference<br>(95% CI) | Mean difference<br>(95% CI) | Mean difference<br>(95% CI) |
| <i>No Hypertensive disorders of pregnancy</i> |                             |                             |                             |
| Diastolic BP (mmHg)                           | -0.75 (-1.97, 0.47)         | -1.15 (-2.38, 0.09)         | -1.25 (-2.38, -0.12)*       |
| Mean arterial pressure                        | -0.63 (-1.81, 0.56)         | -0.76 (-1.95, 0.43)         | -1.11 (-2.20, -0.01)*       |
| LDL cholesterol (mmol/L) ‡                    | 0.00 (-0.10, 0.11)          | 0.02 (-0.09, 0.12)          | -0.03 (-0.12, 0.07)         |
| Glucose (% change)                            | -0.93 (-2.40, 0.55)         | -0.11 (-1.56, 1.35)         | -1.09 (-2.43, 0.25)         |
| <i>Hypertensive disorders of pregnancy</i>    |                             |                             |                             |
| Diastolic BP (mmHg)                           | -2.93 (-5.68, -0.18)*       | -4.82 (-7.64, -2.00)†       | -2.70 (-5.33, -0.07)*       |
| Mean arterial pressure                        | -2.69 (-5.34, -0.05)*       | -4.67 (-7.38, -1.96)†       | -2.87 (-5.40, -0.35)*       |
| LDL cholesterol (mmol/L) ‡                    | -0.23 (-0.45, -0.01)*       | -0.23 (-0.45, -0.00)*       | -0.24 (-0.44, -0.03)*       |
| Glucose (% change)                            | -2.36 (-7.18, 2.47)         | -7.92 (-12.90, -2.95)*      | -5.87 (-10.51, -1.23)*      |

\*p<.05

†p<.001 (Bonferroni correction)

‡LDL- low density lipoprotein

The reference group includes those who never breastfed.

Table S18. Duration of Breastfeeding (months) according to presence of hypertensive disorders of pregnancy (HDPs) and preterm birth

| Breastfeeding outcome            | Category               | No HDP or Preterm Birth (N=2,959) | Preterm Birth Only (n=110) | HDP Only (n=495) | HDP and preterm birth (n=34) |
|----------------------------------|------------------------|-----------------------------------|----------------------------|------------------|------------------------------|
| Any Breastfeeding Duration       | Never breastfed, % (n) | 13.5 (398)                        | 16.4 (18)                  | 17.8 (88)        | 14.7 (5)                     |
|                                  | <1, % (n)              | 8.5 (253)                         | 15.5(17)                   | 8.7 (43)         | 11.8 (4)                     |
|                                  | 1-<3, % (n)            | 11.6 (342)                        | 7.3 (8)                    | 14.7 (73)        | 14.7 (5)                     |
|                                  | 3-<6, % (n)            | 18.5 (548)                        | 19.1 (21)                  | 16.4 (81)        | 8.8 (3)                      |
|                                  | 6-<9, % (n)            | 18.0 (532)                        | 17.3 (19)                  | 18.0 (89)        | 32.4 (11)                    |
|                                  | 9+, % (n)              | 30.0 (886)                        | 24.6 (27)                  | 24.4 (121)       | 17.7 (6)                     |
| Exclusive breastfeeding Duration | Never breastfed, % (n) | 13.5 (398)                        | 16.4 (18)                  | 17.8 (88)        | 14.7 (5)                     |
|                                  | 0-<1, % (n)            | 23.6 (698)                        | 32.7 (36)                  | 25.5 (126)       | 32.4 (11)                    |
|                                  | 1-<3, % (n)            | 23.3 (687)                        | 18.2 (20)                  | 23.0 (114)       | 29.4 (10)                    |
|                                  | 3-6, % (n)             | 39.7 (1,176)                      | 32.7 (36)                  | 33.7 (167)       | 23.5 (8)                     |

Duration of exclusive breastfeeding is likely to differ from duration of any breastfeeding (i.e., a participant exclusively breastfed for 2 months but continued to breastfeed until 6 months). Therefore the percentage and number of individuals in each breastfeeding category cannot be compared between any and exclusive breastfeeding

Table S19. Inverse probability weighting results for associations of any breastfeeding with cardiometabolic outcomes

|                                      | < 1 month                | 1-<3 months              | 3-<6 months              | 6- <9 months             | 9+ months                |
|--------------------------------------|--------------------------|--------------------------|--------------------------|--------------------------|--------------------------|
|                                      | Mean difference (95% CI) | Mean difference (95% CI) | Mean difference (95% CI) | Mean difference (95% CI) | Mean difference (95% CI) |
| Body Mass Index (kg/m <sup>2</sup> ) | -0.44 (-1.03, 0.15)      | -0.18 (-0.67, 0.30)      | -0.00 (-0.47, 0.46)      | -0.40 (-0.85, 0.05)      | -0.41 (-0.83, -0.00)     |
| Waist Circumference (cm)             | -0.38 (-1.91, 1.16)      | -0.67 (-1.91, 0.57)      | -0.18 (-1.35, 0.98)      | -1.07 (-2.21, 0.06)      | -1.07 (-2.13, -0.00)     |
| Systolic BP (mmHg)                   | -0.48 (-2.02, 1.06)      | -1.74 (-3.23, -0.26)     | -0.74 (-2.10, 0.62)      | -1.45 (-2.79, -0.12)     | -2.11 (-3.39, -0.84)     |
| Arterial distensibility (mm)         | 0.00 (-0.01, 0.02)       | 0.01 (-0.01, 0.02)       | 0.00 (-0.01, 0.02)       | 0.01 (-0.01, 0.02)       | 0.00 (-0.01, 0.02)       |
| cIMT (mm) *                          | -0.01 (-0.01, 0.00)      | -0.00 (-0.01, 0.01)      | 0.00 (-0.01, 0.01)       | 0.00 (-0.00, 0.01)       | -0.00 (-0.01, 0.01)      |
| CRP (% change) †                     | -11.31 (-28.13, 5.51)    | -6.41 (-20.88, 8.07)     | -11.86 (-24.72, 1.01)    | -19.99 (-33.74, -6.24)   | -13.95 (-26.20, -1.69)   |
| HDL (mmol/L) ‡                       | -0.01 (-0.06, 0.04)      | 0.05 (0.00, 0.10)        | 0.02 (-0.02, 0.06)       | 0.08 (0.04, 0.13)        | 0.04 (-0.00, 0.08)       |
| Triglycerides (mmol/L)               | -0.08 (-0.18, 0.01)      | -0.10 (-0.19, -0.01)     | -0.07 (-0.16, 0.01)      | -0.13 (-0.21, -0.06)     | -0.13 (-0.20, -0.05)     |
| Insulin (% change)                   | -0.05 (-8.94, 8.85)      | -4.23 (-12.06, 3.60)     | 3.00 (-4.47, 10.47)      | -8.04 (-15.61, -0.47)    | -4.41 (-11.02, 2.21)     |
| Proinsulin (% change)                | -1.57 (-10.46, 7.31)     | -0.35 (-8.79, 8.09)      | 1.67 (-6.39, 9.74)       | -4.35 (-12.66, 3.95)     | -4.80 (-11.55, 1.95)     |

\*cMIT - carotid intima-media thickness

†CRP- C- reactive protein

‡HDL- high density lipoprotein

The reference group includes those who never breastfed

All outcomes were adjusted for age at delivery, race, pre-pregnancy BMI, smoking, marital status, and gestational diabetes. Blood pressure outcomes were further adjusted for use of antihypertensive medications. Glucose, insulin, and proinsulin outcomes were further adjusted for diabetes medications. LDL-cholesterol and HDL-cholesterol outcomes were further adjusted for cholesterol lowering medications.

Inverse probability weighting was further used to examine the potential role of selection bias due to the participation rate at the 18 years follow-up visit. We estimated the probability of attending the follow-up visit 18 years after recruitment according to age, parity, race, marital status, social class, educational level, self-reported pre-pregnancy BMI, smoking status, HDP, and preterm birth in the index pregnancy and used these to weight analyses.

Table S20. Inverse probability weighting results for associations of any breastfeeding with cardiometabolic outcomes stratified by hypertension during pregnancy

|                                               | < 1 month                | 1-<3 months              | 3-<6 months              | 6- <9 months             | 9+ months                |
|-----------------------------------------------|--------------------------|--------------------------|--------------------------|--------------------------|--------------------------|
|                                               | Mean difference (95% CI) | Mean difference (95% CI) | Mean difference (95% CI) | Mean difference (95% CI) | Mean difference (95% CI) |
| <i>No Hypertensive disorders of pregnancy</i> |                          |                          |                          |                          |                          |
| Diastolic BP (mmHg)                           | -0.14 (-1.60, 1.33)      | -1.26 (-2.65, 0.12)      | -0.51 (-1.76, 0.75)      | -1.24 (-2.53, 0.05)      | -1.70 (-2.90, -0.50)     |
| Mean arterial pressure                        | -0.21 (-1.61, 1.19)      | -1.16 (-2.48, 0.17)      | -0.30 (-1.50, 0.90)      | -1.04 (-2.28, 0.19)      | -1.61 (-2.75, -0.47)     |
| LDL cholesterol (mmol/L)*                     | -0.01 (-0.13, 0.12)      | 0.02 (-0.10, 0.13)       | 0.01 (-0.09, 0.11)       | -0.08 (-0.18, 0.03)      | -0.02 (-0.12, 0.08)      |
| Glucose (% change)                            | 0.08 (-1.60, 1.76)       | -1.02 (-2.60, 0.57)      | 0.72 (-0.72, 2.15)       | -0.48 (-1.96, 1.00)      | 0.32 (-1.05, 1.68)       |
| <i>Hypertensive disorders of pregnancy</i>    |                          |                          |                          |                          |                          |
| Diastolic BP (mmHg)                           | -3.14 (-6.56, 0.28)      | -4.00 (-7.00, -1.00)     | -3.02 (-6.05, 0.01)      | -4.36 (-7.30, -1.43)     | -1.78 (-4.66, 1.10)      |
| Mean arterial pressure                        | -3.01 (-6.22, 0.19)      | -4.25 (-7.06, -1.43)     | -3.26 (-6.10, -0.41)     | -4.32 (-7.07, -1.57)     | -2.17 (-4.87, 0.54)      |
| LDL cholesterol (mmol/L)*                     | -0.25 (-0.52, 0.02)      | -0.26 (-0.50, -0.02)     | -0.11 (-0.36, 0.13)      | -0.31 (-0.55, -0.08)     | -0.16 (-0.39, 0.07)      |
| Glucose (% change)                            | -1.48 (-6.25, 3.30)      | -2.75 (-7.05, 1.55)      | -1.33 (-5.60, 2.95)      | -3.53 (-7.67, 0.62)      | -2.65 (-6.77, 1.48)      |

\*LDL- low density lipoprotein

Reference group=participants who never breastfed

All outcomes were adjusted for age at delivery, race, pre-pregnancy BMI, smoking, marital status, and gestational diabetes. Blood pressure outcomes were further adjusted for use of antihypertensive medications. Glucose, insulin, and proinsulin outcomes were further adjusted for diabetes medications. LDL-cholesterol and HDL-cholesterol outcomes were further adjusted for cholesterol lowering medications.

Inverse probability weighting was further used to examine the potential role of selection bias due to the participation rate at the 18 years follow-up visit. We estimated the probability of attending the follow-up visit 18 years after recruitment according to age, parity, race, marital status, social class, educational level, self-reported pre-pregnancy BMI, smoking status, HDP, and preterm birth in the index pregnancy and used these to weight analyses.

Table S21. Inverse probability weighting results for associations of exclusive breastfeeding with cardiometabolic outcomes

|                                      | < 1 month                | 1-<3 months              | 3-<6 months              |
|--------------------------------------|--------------------------|--------------------------|--------------------------|
|                                      | Mean difference (95% CI) | Mean difference (95% CI) | Mean difference (95% CI) |
| Body Mass Index (kg/m <sup>2</sup> ) | -0.24 (-0.62, 0.15)      | -0.09 (-0.48, 0.30)      | -0.40 (-0.77, -0.02)     |
| Waist Circumference (cm)             | -0.46 (-1.50, 0.57)      | -0.27 (-1.32, 0.79)      | -0.94 (-1.94, 0.07)      |
| Systolic BP (mmHg)                   | 0.13 (-1.23, 1.50)       | 0.23 (-1.17, 1.62)       | -0.53 (-1.86, 0.80)      |
| Arterial distensibility (mm)         | 0.00 (-0.01, 0.01)       | -0.00 (-0.02, 0.01)      | 0.00 (-0.01, 0.02)       |
| cIMT(mm) *                           | 0.00 (-0.01, 0.01)       | -0.00 (-0.01, 0.01)      | 0.00 (-0.00, 0.01)       |
| CRP (% change) †                     | -10.34 (-23.63, 2.95)    | -19.66 (-33.15, -6.17)   | -13.51 (-26.42, -0.60)   |
| HDL (mmol/L) ‡                       | 0.01 (-0.03, 0.06)       | 0.04 (-0.00, 0.09)       | 0.04 (-0.00, 0.09)       |
| Triglycerides (mmol/L)               | -0.01 (-0.08, 0.05)      | -0.06 (-0.12, 0.00)      | -0.05 (-0.11, 0.01)      |
| Insulin (% change)                   | 2.72 (-4.39, 9.84)       | -1.68 (-8.89, 5.54)      | -1.98 (-8.89, 4.93)      |
| Proinsulin (% change)                | 0.64 (-6.35, 7.64)       | 0.86 (-6.25, 7.98)       | 0.33 (-6.47, 7.13)       |

\*cMIT - carotid intima-media thickness

†CRP- C- reactive protein

‡HDL- high density lipoprotein

Reference group=participants who never breastfed

All outcomes were adjusted for age at delivery, race, pre-pregnancy BMI, smoking, marital status, and gestational diabetes. Blood pressure outcomes were further adjusted for use of antihypertensive medications. Glucose, insulin, and proinsulin outcomes were further adjusted for diabetes medications. LDL-cholesterol and HDL-cholesterol outcomes were further adjusted for cholesterol lowering medications.

Inverse probability weighting was further used to examine the potential role of selection bias due to the participation rate at the 18 years follow-up visit. We estimated the probability of attending the follow-up visit 18 years after recruitment according to age, parity, race, marital status, social class, educational level, self-reported pre-pregnancy BMI, smoking status, HDP, and preterm birth in the index pregnancy and used these to weight analyses.

Table S22. Inverse probability weighting results for associations of exclusive breastfeeding with cardiometabolic outcomes stratified by hypertension during pregnancy

|                                               | < 1 month               | 1-<3 months             | 3-<6 months             |
|-----------------------------------------------|-------------------------|-------------------------|-------------------------|
|                                               | Mean difference(95% CI) | Mean difference(95% CI) | Mean difference(95% CI) |
| <i>No Hypertensive disorders of pregnancy</i> |                         |                         |                         |
| Diastolic BP (mmHg)                           | -0.54 (-1.72, 0.65)     | -0.98 (-2.19, 0.23)     | -0.81 (-1.96, 0.34)     |
| Mean arterial pressure                        | -0.31 (-1.45, 0.82)     | -0.58 (-1.73, 0.58)     | -0.72 (-1.82, 0.39)     |
| LDL cholesterol (mmol/L)*                     | -0.02 (-0.12, 0.08)     | 0.00 (-0.10, 0.11)      | -0.03 (-0.13, 0.06)     |
| Glucose (% change)                            | -0.33 (-1.70, 1.04)     | 0.19 (-1.20, 1.58)      | -0.03 (-1.37, 1.30)     |
| <i>Hypertensive disorders of pregnancy</i>    |                         |                         |                         |
| Diastolic BP (mmHg)                           | -2.90 (-6.09, 0.28)     | -4.20 (-7.36, -1.04)    | -1.39 (-4.56, 1.77)     |
| Mean arterial pressure                        | -2.74 (-5.90, 0.43)     | -3.77 (-6.92, -0.63)    | -1.13 (-4.27, 2.01)     |
| LDL cholesterol (mmol/L)                      | -0.51 (-0.82, -0.20)    | -0.34 (0.66, -0.02)     | -0.46 (-0.78, -0.15)    |
| Glucose (% change)                            | -1.63 (-7.39, 4.12)     | -4.63 (-10.39, 1.14)    | -2.58 (-8.29, 3.14)     |

\*LDL- low density lipoprotein

The reference group includes those who never breastfed

All outcomes were adjusted for age at delivery, race, pre-pregnancy BMI, smoking, marital status, and gestational diabetes. Blood pressure outcomes were further adjusted for use of antihypertensive medications. Glucose, insulin, and proinsulin outcomes were further adjusted for diabetes medications. LDL-cholesterol and HDL-cholesterol outcomes were further adjusted for cholesterol lowering medications.

Inverse probability weighting was further used to examine the potential role of selection bias due to the participation rate at the 18 years follow-up visit. We estimated the probability of attending the follow-up visit 18 years after recruitment according to age, parity, race, marital status, social class, educational level, self-reported pre-pregnancy BMI, smoking status, HDP, and preterm birth in the index pregnancy and used these to weight analyses.

Table S23. Sensitivity analysis for associations of any breastfeeding with cardiometabolic outcomes restricted to primiparous women

|                                      | < 1 month               | 1-<3 months             | 3-<6 months             | 6- <9 months            | 9+ months               |
|--------------------------------------|-------------------------|-------------------------|-------------------------|-------------------------|-------------------------|
|                                      | Mean difference(95% CI) | Mean difference(95% CI) | Mean difference(95% CI) | Mean difference(95% CI) | Mean difference(95% CI) |
| Body Mass Index (kg/m <sup>2</sup> ) | -0.36 (-1.11, 0.39)     | -0.67 (-1.39, 0.04)     | -0.30 (-0.95, 0.35)     | -0.67 (-1.35, -0.00)    | -0.65 (-1.31, 0.01)     |
| Waist Circumference (cm)             | -0.23 (-2.19, 1.74)     | -1.82 (-3.69, 0.06)     | -1.09 (-2.80, 0.61)     | -1.99 (-3.75, -0.23)    | -2.50 (-4.23, -0.77)    |
| Systolic BP (mmHg)                   | -0.59 (-3.17, 1.99)     | -1.18 (-3.63, 1.27)     | -0.06 (-2.29, 2.16)     | 0.23 (-2.08, 2.54)      | -0.89 (-3.15, 1.38)     |
| Arterial distensibility (mm)         | -0.02 (-0.05, 0.00)     | -0.00 (-0.03, 0.02)     | -0.01 (-0.03, 0.01)     | -0.00 (-0.03, 0.02)     | -0.01 (-0.03, 0.01)     |
| cIMT(mm) *                           | -0.02 (-0.03, -0.00)    | -0.01 (-0.02, 0.01)     | -0.00 (-0.01, 0.01)     | 0.00 (-0.01, 0.01)      | -0.01 (-0.02, 0.00)     |
| CRP (% change) †                     | -16.01 (-41.32, 9.29)   | -28.51 (-52.70, -4.31)  | -22.81 (-44.68, -0.95)  | -26.50 (-49.45, -3.55)  | -20.77 (-42.80, 1.25)   |
| HDL (mmol/L) ‡                       | -0.05 (-0.14, 0.04)     | 0.02 (-0.06, 0.11)      | 0.00 (-0.08, 0.08)      | 0.09 (0.01, 0.17)       | 0.03 (-0.05, 0.11)      |
| Triglycerides (mmol/L)               | 0.08 (-0.03, 0.19)      | -0.04 (-0.14, 0.05)     | 0.02 (-0.08, 0.12)      | -0.04 (-0.14, 0.05)     | -0.06 (-0.16, 0.04)     |
| Insulin (% change)                   | 0.88 (-12.62, 14.38)    | -10.39 (-23.52, 2.75)   | -4.84 (-16.76, 7.09)    | -8.82 (-21.23, 3.60)    | -10.31 (-22.26, 1.65)   |
| Proinsulin (% change)                | -1.75 (-14.26, 10.76)   | -10.96 (-22.74, 0.83)   | -5.06 (-15.62, 5.50)    | -6.79 (-17.62, 4.04)    | -12.70 (-23.16, -2.25)  |

\*cMIT - carotid intima-media thickness

†CRP- C- reactive protein

‡HDL- high density lipoprotein

Reference group=participants who never breastfed

All outcomes were adjusted for age at delivery, race, pre-pregnancy BMI, smoking, marital status, and gestational diabetes. Blood pressure outcomes were further adjusted for use of antihypertensive medications. Glucose, insulin, and proinsulin outcomes were further adjusted for diabetes medications. LDL-cholesterol and HDL-cholesterol outcomes were further adjusted for cholesterol lowering medications.



Table S24. Sensitivity analysis for associations of any breastfeeding with cardiometabolic outcomes by hypertension during pregnancy restricted to primiparous women

|                                               | < 1 month                | 1-<3 months              | 3-<6 months              | 6- <9 months             | 9+ months                |
|-----------------------------------------------|--------------------------|--------------------------|--------------------------|--------------------------|--------------------------|
|                                               | Mean difference (95% CI) | Mean difference (95% CI) | Mean difference (95% CI) | Mean difference (95% CI) | Mean difference (95% CI) |
| <i>No Hypertensive disorders of pregnancy</i> |                          |                          |                          |                          |                          |
| Diastolic BP (mmHg)                           | -0.87 (-3.34, 1.60)      | -1.50 (-3.95, 0.95)      | 0.78 (-1.40, 2.95)       | -0.04 (-2.29, 2.22)      | -2.55 (-4.76, -0.35)     |
| Mean arterial pressure                        | -0.57 (-2.93, 1.79)      | -1.28 (-3.62, 1.05)      | 0.97 (-1.10, 3.04)       | 0.36 (-1.79, 2.51)       | -1.74 (-3.84, 0.36)      |
| LDL cholesterol (mmol/L)*                     | 0.13 (-0.09, 0.35)       | 0.10 (-0.11, 0.31)       | 0.08 (-0.11, 0.28)       | -0.04 (-0.23, 0.16)      | -0.06 (-0.25, 0.13)      |
| Glucose (% change)                            | 0.51 (-1.95, 2.97)       | -0.10 (-2.57, 2.37)      | 1.05 (-1.16, 3.27)       | -0.03 (-2.29, 2.23)      | -0.68 (-2.89, 1.53)      |
| <i>Hypertensive disorders of pregnancy</i>    |                          |                          |                          |                          |                          |
| Diastolic BP (mmHg)                           | -2.24 (-6.45, 1.97)      | -2.94 (-6.35, 0.46)      | -3.99 (-7.53, -0.45)     | -3.71 (-7.19, -0.22)     | -0.82 (-4.31, 2.68)      |
| Mean arterial pressure                        | -1.36 (-5.55, 2.83)      | -2.82 (-6.21, 0.56)      | -3.88 (-7.39, -0.36)     | -3.09 (-6.55, 0.38)      | -0.87 (-4.35, 2.60)      |
| LDL cholesterol (mmol/L)*                     | -0.49 (-0.90, -0.08)     | -0.47 (-0.82, -0.13)     | -0.31 (-0.65, 0.03)      | -0.54 (-0.88, -0.20)     | -0.35 (-0.71, 0.01)      |
| Glucose (% change)                            | -0.44 (-7.82, 6.94)      | -6.38 (-12.47, -0.29)    | -0.77 (-7.28, 5.73)      | -3.26 (-9.33, 2.82)      | -1.33 (-7.56, 4.90)      |

\*LDL- low density lipoprotein

Reference group=participants who never breastfed

All outcomes were adjusted for age at delivery, race, pre-pregnancy BMI, smoking, marital status, and gestational diabetes. Blood pressure outcomes were further adjusted for use of antihypertensive medications. Glucose, insulin, and proinsulin outcomes were further adjusted for diabetes medications. LDL-cholesterol and HDL-cholesterol outcomes were further adjusted for cholesterol lowering medications.

Table S25. Sensitivity analysis for associations of exclusive breastfeeding with cardiometabolic outcomes restricted to primiparous women

|                                      | < 1 month                | 1-<3 months              | 3-<6 months              |
|--------------------------------------|--------------------------|--------------------------|--------------------------|
|                                      | Mean difference (95% CI) | Mean difference (95% CI) | Mean difference (95% CI) |
| Body Mass Index (kg/m <sup>2</sup> ) | -0.05 (-0.75, 0.65)      | -0.49 (-1.19, 0.22)      | -0.60 (-1.29, 0.09)      |
| Waist Circumference (cm)             | -0.22 (2.08, 1.64)       | -1.06 (-2.93, 0.81)      | -1.79 (-3.62, 0.05)      |
| Systolic BP (mmHg)                   | 0.19 (-2.27, 2.64)       | 0.91 (-1.55, 3.36)       | 0.29 (-2.12, 2.70)       |
| Arterial distensibility (mm)         | -0.01 (-0.04, 0.01)      | -0.01 (-0.03, 0.02)      | -0.00 (-0.03, 0.02)      |
| cIMT(mm) *                           | -0.01 (-0.02, 0.01)      | -0.01 (-0.02, 0.01)      | -0.00 (-0.01, 0.01)      |
| CRP (% change) †                     | -3.12 (-27.08, 20.85)    | -24.82 (-49.42, -0.22)   | -19.34 (-43.28, 4.60)    |
| HDL (mmol/L) ‡                       | -0.05 (-0.14, 0.03)      | 0.05 (-0.03, 0.13)       | 0.02 (-0.06, 0.11)       |
| Triglycerides (mmol/L)               | 0.07 (-0.03, 0.17)       | -0.08 (-0.18, 0.02)      | 0.01 (-0.09, 0.11)       |
| Insulin (% change)                   | -2.21 (-15.08, 10.65)    | -14.23 (-27.18, -1.29)   | -7.59 (-20.08, 4.91)     |
| Proinsulin (% change)                | -2.71 (-14.68, 9.25)     | -10.40 (-22.27, 1.48)    | -5.05 (-16.16, 6.06)     |

\*cMIT - carotid intima-media thickness

†CRP- C- reactive protein

‡HDL- high density lipoprotein

Reference group=participants who never breastfed

All outcomes were adjusted for age at delivery, race, pre-pregnancy BMI, smoking, marital status, and gestational diabetes. Blood pressure outcomes were further adjusted for use of antihypertensive medications. Glucose, insulin, and proinsulin outcomes were further adjusted for diabetes medications. LDL-cholesterol and HDL-cholesterol outcomes were further adjusted for cholesterol lowering medications.

Table S26. Sensitivity analysis for associations of exclusive breastfeeding with cardiometabolic outcomes by hypertension during pregnancy restricted to primiparous women

|                                               | < 1 month               | 1-<3 months             | 3-<6 months             |
|-----------------------------------------------|-------------------------|-------------------------|-------------------------|
|                                               | Mean difference(95% CI) | Mean difference(95% CI) | Mean difference(95% CI) |
| <i>No Hypertensive disorders of pregnancy</i> |                         |                         |                         |
| Diastolic BP (mmHg)                           | -1.04 (-3.15, 1.08)     | -0.07 (-2.20, 2.06)     | -1.01 (-3.10, 1.08)     |
| Mean arterial pressure                        | -0.63 (-2.64, 1.38)     | 0.25 (-1.77, 2.28)      | -0.58 (-2.57, 1.41)     |
| LDL cholesterol (mmol/L)*                     | 0.11 (-0.08, 0.29)      | -0.01 (-0.19, 0.18)     | 0.01 (-0.17, 0.20)      |
| Glucose (% change)                            | 0.49 (-1.66, 2.63)      | -0.36 (-1.76, 2.49)     | -0.23 (-2.31, 1.86)     |
| <i>Hypertensive disorders of pregnancy</i>    |                         |                         |                         |
| Diastolic BP (mmHg)                           | -2.90 (-6.09, 0.28)     | -4.20 (-7.36, -1.04)    | -1.39 (-4.56, 1.77)     |
| Mean arterial pressure                        | -2.74 (-5.90, 0.43)     | -3.77 (-6.92, -0.63)    | -1.13 (-4.27, 2.01)     |
| LDL cholesterol (mmol/L)*                     | -0.51 (-0.81, -0.20)    | -0.34 (-0.66, -0.02)    | -0.46 (-0.78, -0.15)    |
| Glucose (% change)                            | -1.63 (-7.39, 4.12)     | -4.63 (-10.39, 1.14)    | -2.58 (-8.29, 3.14)     |

\*LDL- low density lipoprotein

Reference group=participants who never breastfed

All outcomes were adjusted for age at delivery, race, pre-pregnancy BMI, smoking, marital status, and gestational diabetes. Blood pressure outcomes were further adjusted for use of antihypertensive medications. Glucose, insulin, and proinsulin outcomes were further adjusted for diabetes medications. LDL-cholesterol and HDL-cholesterol outcomes were further adjusted for cholesterol lowering medications.

Table S27. Sensitivity analysis for associations of any breastfeeding with cardiometabolic outcomes restricted to multiparous women

|                                      | < 1 month               | 1-<3 months             | 3-<6 months             | 6- <9 months            | 9+ months               |
|--------------------------------------|-------------------------|-------------------------|-------------------------|-------------------------|-------------------------|
|                                      | Mean difference(95% CI) | Mean difference(95% CI) | Mean difference(95% CI) | Mean difference(95% CI) | Mean difference(95% CI) |
| Body Mass Index (kg/m <sup>2</sup> ) | -0.32 (-0.94, 0.30)     | -0.18 (-0.74, 0.38)     | -0.09 (-0.60, -0.42)    | -0.53 (-1.04, -0.01)    | -0.44 (-0.90, 0.03)     |
| Waist Circumference (cm)             | -0.64 (-2.31, 1.03)     | -0.86 (-2.36, 0.63)     | -0.37 (-1.74, 1.01)     | -1.06 (-2.43, 0.31)     | -0.75 (-1.99, 0.50)     |
| Systolic BP (mmHg)                   | -0.40 (-2.59, 1.79)     | -1.23 (-3.20, 0.74)     | 0.19 (-1.61, 1.98)      | -0.78 (-2.59, 1.03)     | -1.14 (-2.78, 0.50)     |
| Arterial distensibility (mm)         | 0.01 (-0.01, 0.03)      | 0.01 (-0.01, 0.03)      | 0.00 (-0.01, 0.02)      | 0.01 (-0.01, 0.03)      | 0.01 (-0.01, 0.02)      |
| cIMT(mm) *                           | -0.00 (-0.02, 0.01)     | 0.00 (-0.01, 0.01)      | 0.01 (-0.00, 0.01)      | 0.00 (-0.00, 0.01)      | 0.00 (-0.01, 0.01)      |
| CRP (% change) †                     | -20.48 (-40.23, -0.72)  | -9.77 (-27.63, 8.08)    | -18.89 (-35.00, -2.78)  | -25.31 (-41.68, -8.95)  | -20.92 (-35.59, -6.24)  |
| HDL (mmol/L) ‡                       | 0.01 (-0.06, 0.08)      | 0.09 (0.03, 0.15)       | 0.04 (-0.02, 0.09)      | 0.06 (0.00, 0.11)       | 0.05 (-0.00, 0.10)      |
| Triglycerides (mmol/L)               | -0.10 (-0.20, 0.00)     | -0.12 (-0.20, -0.03)    | -0.04 (-0.12, 0.04)     | -0.08 (-0.16, 0.01)     | -0.09 (-0.16, -0.01)    |
| Insulin (% change)                   | -3.64 (-14.49, 7.20)    | -9.05 (-18.89, 0.79)    | 0.64 (-8.16, 9.45)      | -11.94 (-20.70, -3.18)  | -5.48 (-13.41, 2.46)    |
| Proinsulin (% change)                | -1.80 (-12.13, 8.54)    | -2.45 (-11.65, 6.74)    | 3.79 (-4.51, 12.08)     | -10.03 (-18.37, -1.69)  | -4.92 (-12.46, 2.63)    |

\*cMIT - carotid intima-media thickness

†CRP- C- reactive protein

‡HDL- high density lipoprotein

Reference group=participants who never breastfed

All outcomes were adjusted for age at delivery, race, pre-pregnancy BMI, smoking, marital status, and gestational diabetes. Blood pressure outcomes were further adjusted for use of antihypertensive medications. Glucose, insulin, and proinsulin outcomes were further adjusted for diabetes medications. LDL-cholesterol and HDL-cholesterol outcomes were further adjusted for cholesterol lowering medications.

Table S28. Sensitivity analysis for associations of any breastfeeding with cardiometabolic outcomes by hypertension during pregnancy restricted to multiparous women

|                                               | < 1 month                | 1-<3 months              | 3-<6 months              | 6- <9 months             | 9+ months                |
|-----------------------------------------------|--------------------------|--------------------------|--------------------------|--------------------------|--------------------------|
|                                               | Mean difference (95% CI) | Mean difference (95% CI) | Mean difference (95% CI) | Mean difference (95% CI) | Mean difference (95% CI) |
| <i>No Hypertensive disorders of pregnancy</i> |                          |                          |                          |                          |                          |
| Diastolic BP (mmHg)                           | 0.24 (-1.74, 2.21)       | -1.15 (-2.91, 0.61)      | -0.59 (-2.20, 1.02)      | -0.66 (-2.28, 0.95)      | -0.73 (-2.20, 0.74)      |
| Mean arterial pressure                        | 0.16 (-1.74, 2.06)       | -1.08 (-2.77, 0.62)      | -0.22 (-1.76, 1.33)      | -0.52 (-2.08, 1.04)      | -0.75 (-2.16, 0.67)      |
| LDL cholesterol (mmol/L)*                     | -0.05 (-0.21, 0.12)      | -0.03 (-0.18, 0.12)      | -0.04 (-0.17, 0.09)      | -0.05 (-0.18, 0.08)      | -0.05 (-0.17, 0.07)      |
| Glucose (% change)                            | -0.73 (-2.88, 1.42)      | -0.94 (-2.94, 1.06)      | 0.88 (-0.87, 2.62)       | -0.93 (-2.68, 0.83)      | 0.14 (-1.44, 1.72)       |
| <i>Hypertensive disorders of pregnancy</i>    |                          |                          |                          |                          |                          |
| Diastolic BP (mmHg)                           | -4.47 (-10.28, 1.34)     | -2.55 (-7.98, 2.88)      | -2.49 (-7.62, 2.64)      | -6.88 (-11.83, -1.94)    | -2.71 (-7.37, 1.95)      |
| Mean arterial pressure                        | -4.52 (-9.89, 0.85)      | -2.82 (-7.84, 2.20)      | -2.80 (-7.54, 1.95)      | -6.75 (-11.32, -2.18)    | -3.05 (-7.36, 1.26)      |
| LDL cholesterol (mmol/L)*                     | -0.00 (-0.38, 0.38)      | -0.30 (-0.66, 0.05)      | -0.09 (-0.42, 0.25)      | -0.25 (-0.56, 0.07)      | -0.16 (-0.46, 0.14)      |
| Glucose (% change)                            | -0.34 (-6.49, 5.82)      | -0.78 (-6.76, 5.20)      | -1.77 (-7.24, 3.70)      | -4.01 (-9.37, 1.36)      | -3.97 (-9.02, 1.08)      |

\*LDL- low density lipoprotein

Reference group=participants who never breastfed

All outcomes were adjusted for age at delivery, race, pre-pregnancy BMI, smoking, marital status, and gestational diabetes. Blood pressure outcomes were further adjusted for use of antihypertensive medications. Glucose, insulin, and proinsulin outcomes were further adjusted for diabetes medications. LDL-cholesterol and HDL-cholesterol outcomes were further adjusted for cholesterol lowering medications.

Table S29. Sensitivity analysis for associations of exclusive breastfeeding with cardiometabolic outcomes restricted to multiparous women

|                                      | < 1 month                | 1-<3 months              | 3-<6 months              |
|--------------------------------------|--------------------------|--------------------------|--------------------------|
|                                      | Mean difference (95% CI) | Mean difference (95% CI) | Mean difference (95% CI) |
| Body Mass Index (kg/m <sup>2</sup> ) | -0.33 (-0.82, 0.17)      | -0.12 (-0.62, 0.39)      | -0.40 (-0.86, 0.07)      |
| Waist Circumference (cm)             | -0.83 (-2.17, 0.52)      | -0.35 (-1.72, 1.02)      | -0.89 (-2.16, 0.38)      |
| Systolic BP (mmHg)                   | -0.43 (-2.17, 1.32)      | 0.33 (-1.43, 2.09)       | -0.71 (-2.34, 0.93)      |
| Arterial distensibility (mm)         | 0.01 (-0.01, 0.03)       | -0.00 (-0.02, 0.01)      | 0.01 (-0.01, 0.02)       |
| cIMT(mm) *                           | 0.00 (-0.01, 0.01)       | 0.00 (-0.01, 0.01)       | 00.01 (-0.00, 0.01)      |
| CRP (% change) †                     | -21.76 (-37.74, -5.79)   | -23.40 (-39.68, -7.11)   | -18.50 (-33.63, -3.36)   |
| HDL (mmol/L) ‡                       | 0.05 (-0.00, 0.11)       | 0.03 (-0.03, 0.09)       | 0.05 (-0.01, 0.10)       |
| Triglycerides (mmol/L)               | -0.08 (-0.16, -0.00)     | -0.05 (-0.13, 0.03)      | -0.07 (-0.15, 0.00)      |
| Insulin (% change)                   | -4.26 (-13.11, 4.59)     | -2.56 (-12.30, 5.19)     | -5.69 (-13.91, 2.54)     |
| Proinsulin (% change)                | -3.87 (-12.17, 4.44)     | -0.77 (-8.91, 7.36)      | -3.63 (-11.36, 4.11)     |

\*cMIT - carotid intima-media thickness

†CRP- C- reactive protein

‡HDL- high density lipoprotein

Reference group=participants who never breastfed

All outcomes were adjusted for age at delivery, race, pre-pregnancy BMI, smoking, marital status, and gestational diabetes. Blood pressure outcomes were further adjusted for use of antihypertensive medications. Glucose, insulin, and proinsulin outcomes were further adjusted for diabetes medications. LDL-cholesterol and HDL-cholesterol outcomes were further adjusted for cholesterol lowering medications.

Table S30. Sensitivity analysis for associations of exclusive breastfeeding with cardiometabolic outcomes by hypertension during pregnancy restricted to multiparous women

|                                               | < 1 month               | 1-<3 months             | 3-<6 months             |
|-----------------------------------------------|-------------------------|-------------------------|-------------------------|
|                                               | Mean difference(95% CI) | Mean difference(95% CI) | Mean difference(95% CI) |
| <i>No Hypertensive disorders of pregnancy</i> |                         |                         |                         |
| Diastolic BP (mmHg)                           | -0.32 (-1.82, 1.18)     | -1.09 (-2.61, 0.43)     | -0.58 (-1.99, 0.84)     |
| Mean arterial pressure                        | -0.36 (-1.80, 1.09)     | -0.62 (-2.08, 0.85)     | -0.62 (-1.98, 0.74)     |
| LDL cholesterol (mmol/L)*                     | -0.07 (-0.20, 0.05)     | 0.04 (-0.08, 0.16)      | -0.08 (-0.20, 0.04)     |
| Glucose (% change)                            | -0.93 (-2.59, 0.73)     | 0.60 (-1.03, 2.22)      | -0.17 (-1.70, 1.37)     |
| <i>Hypertensive disorders of pregnancy</i>    |                         |                         |                         |
| Diastolic BP (mmHg)                           | -2.88 (-7.31, 1.55)     | -4.68 (-9.49, 0.14)     | -4.03 (-8.44, 0.38)     |
| Mean arterial pressure                        | -2.67 (-6.76, 1.41)     | -4.66 (-9.10, -0.21)    | -4.73 (-8.80, -0.67)    |
| LDL cholesterol (mmol/L)*                     | -0.04 (-0.33, 0.25)     | -0.28 (-0.59, 0.02)     | -0.22 (-0.50, 0.06)     |
| Glucose (% change)                            | -0.80 (-5.60, 4.00)     | -3.02 (-8.17, 2.14)     | -3.73 (-8.54, 1.09)     |

\*LDL- low density lipoprotein

Reference group=participants who never breastfed

All outcomes were adjusted for age at delivery, race, pre-pregnancy BMI, smoking, marital status, and gestational diabetes. Blood pressure outcomes were further adjusted for use of antihypertensive medications. Glucose, insulin, and proinsulin outcomes were further adjusted for diabetes medications. LDL-cholesterol and HDL-cholesterol outcomes were further adjusted for cholesterol lowering medications.
